# Supplementary material
Source: PubMed Central journal article supplement (PMC3505809)

# Supporting figure 1

## A

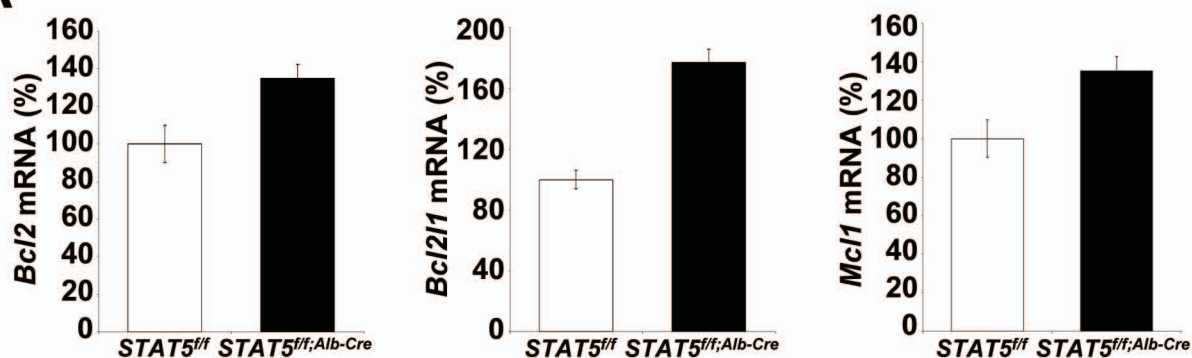

## B

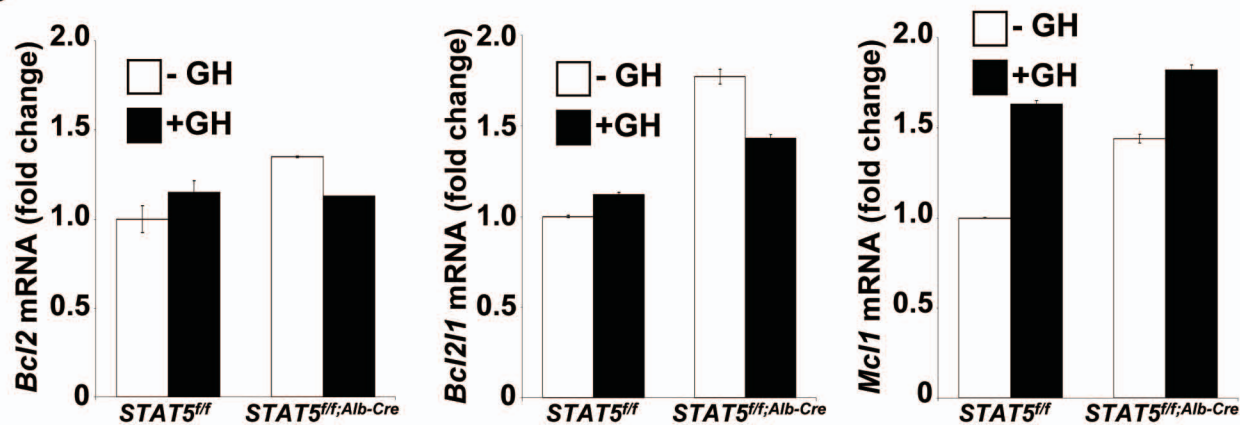

## C

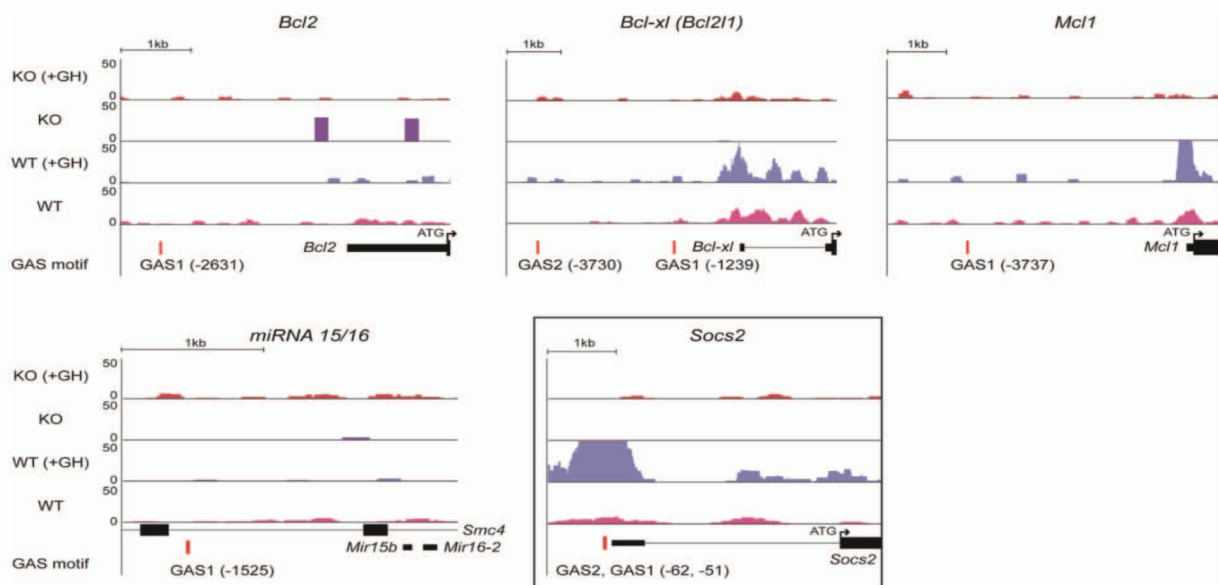

## D

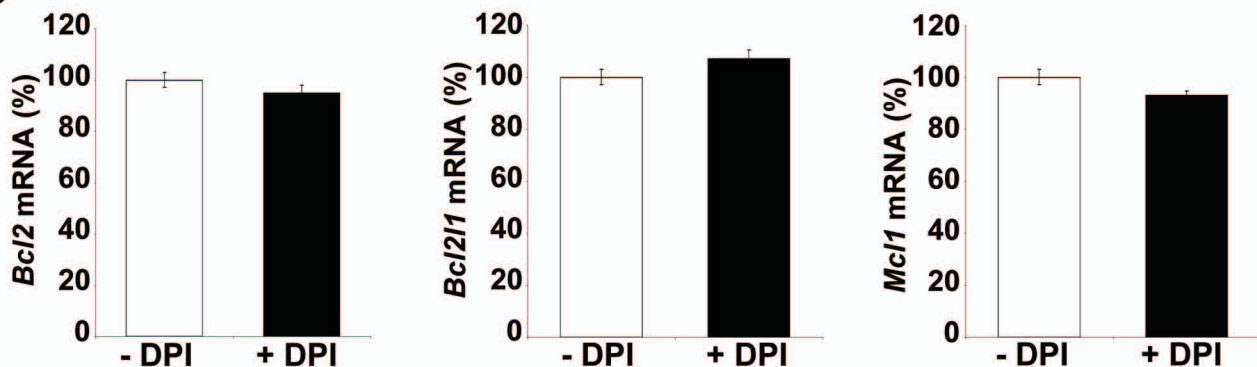

# Supporting figure 2

## A

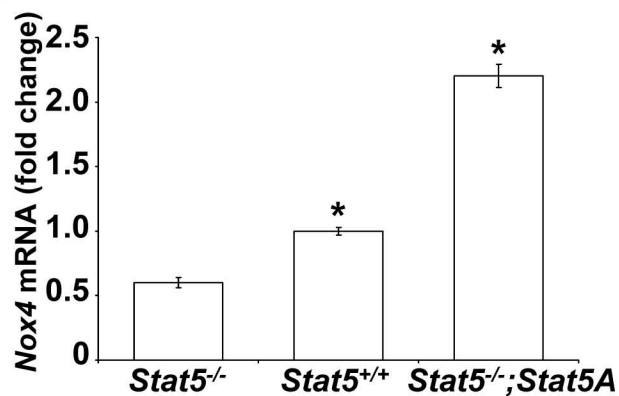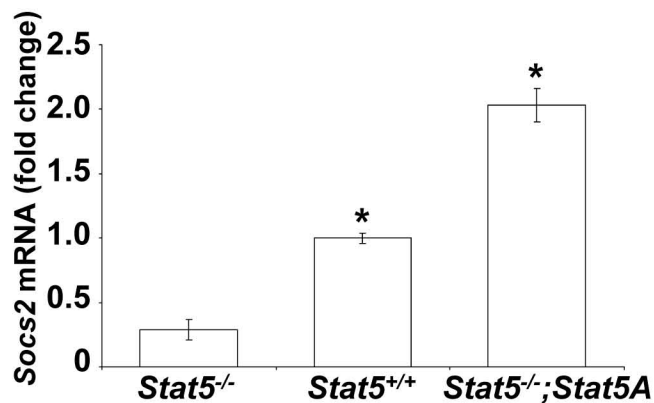

## B

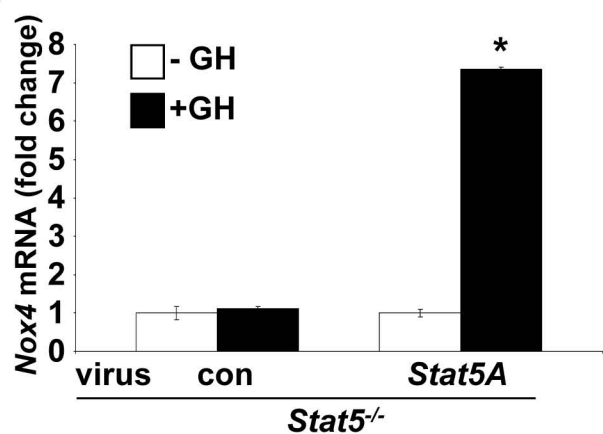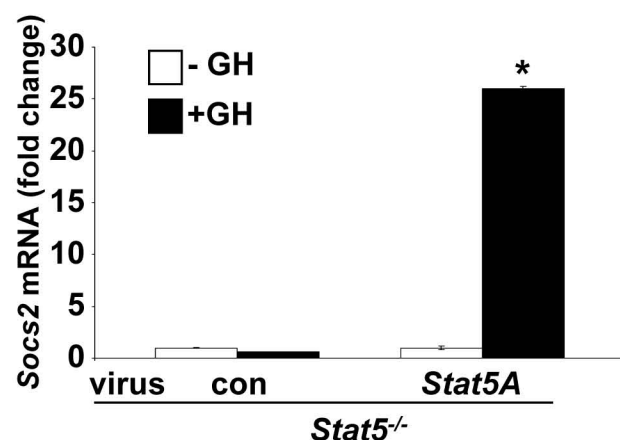

## C

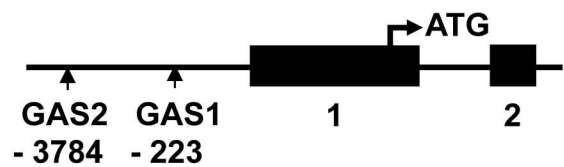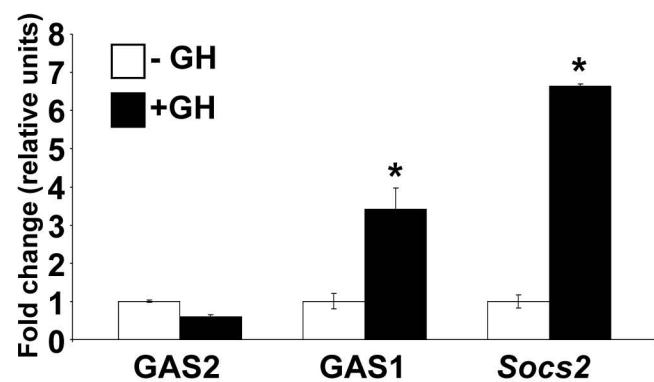

## D

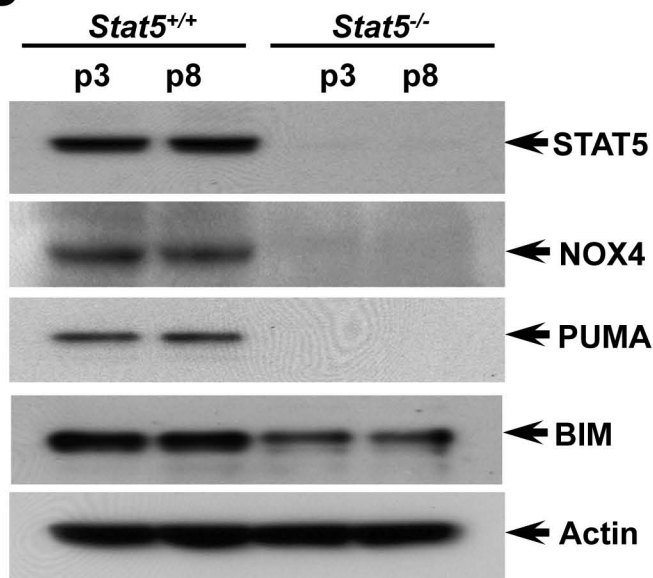

## E

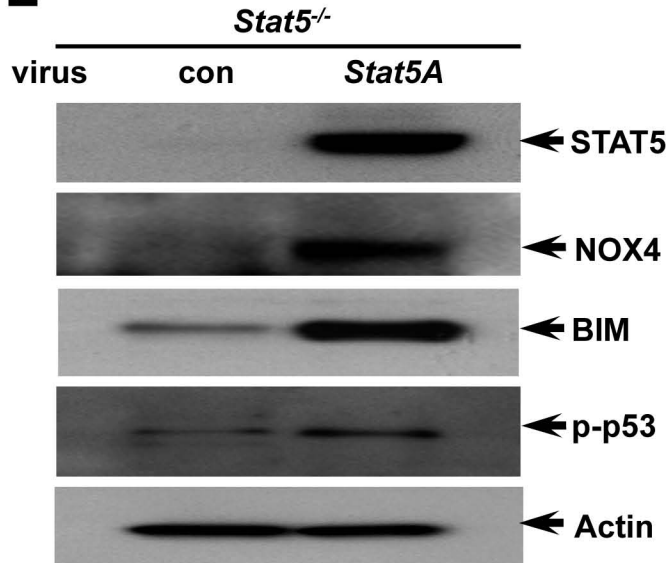

# Supporting figure 3

## A

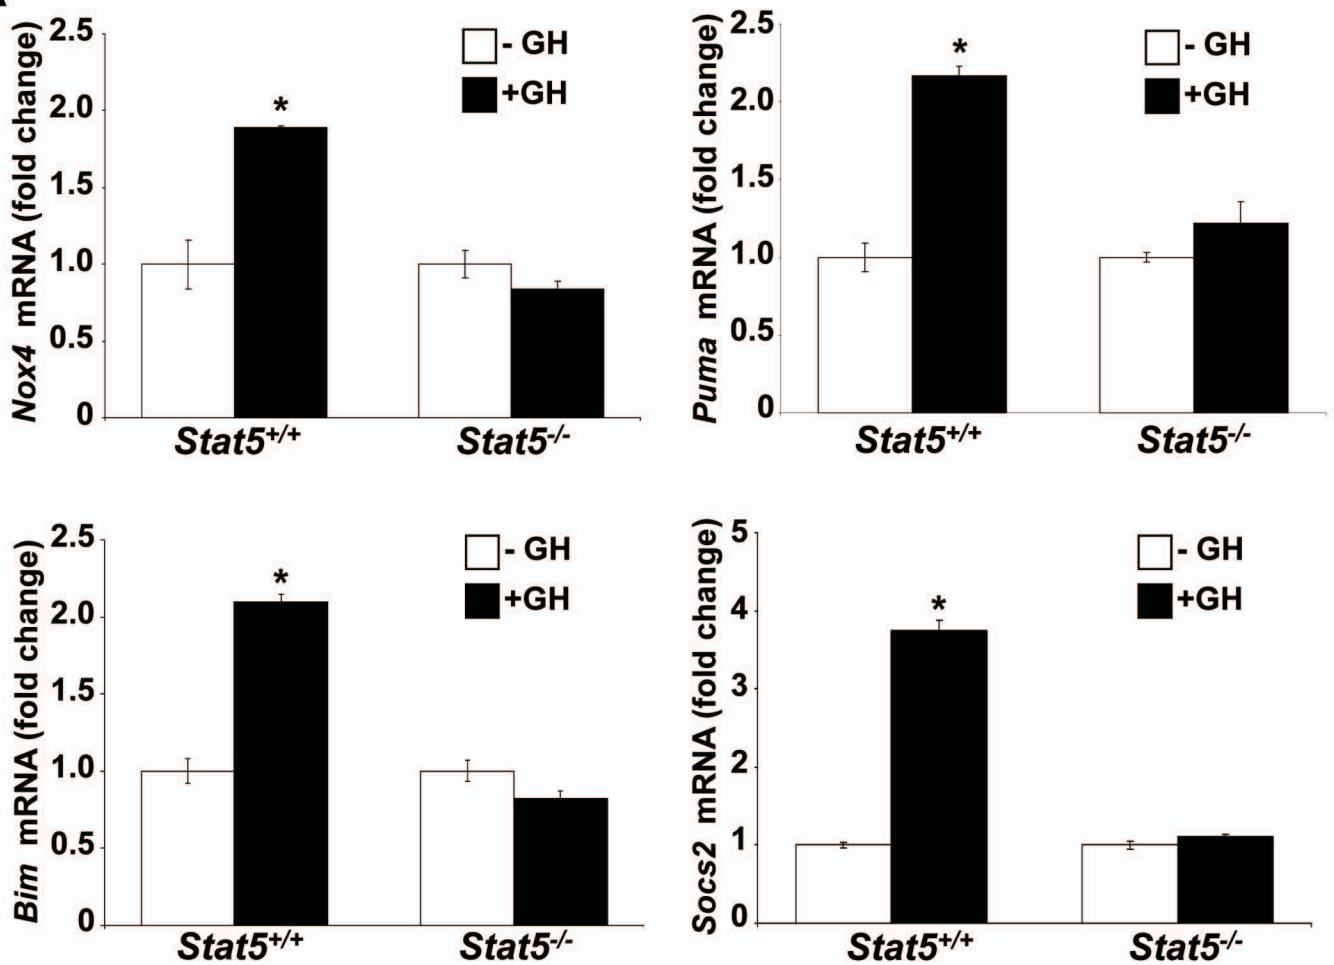

## B

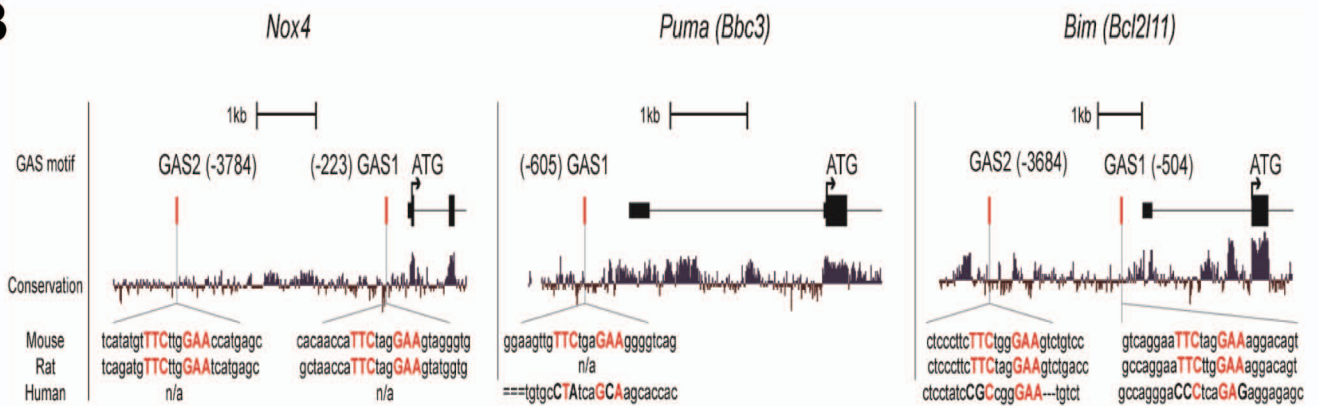

## C

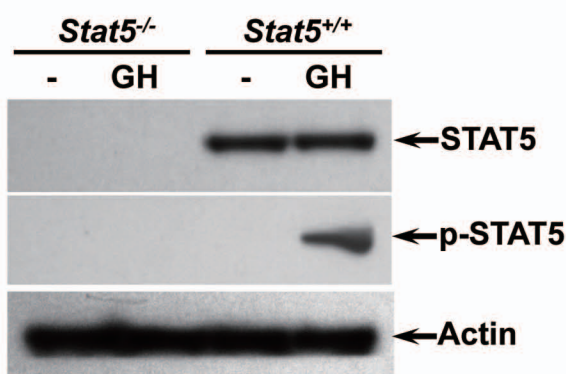

## D

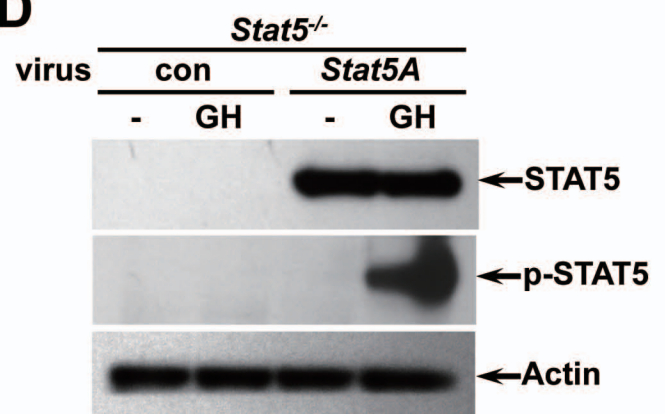

# Supporting figure 4

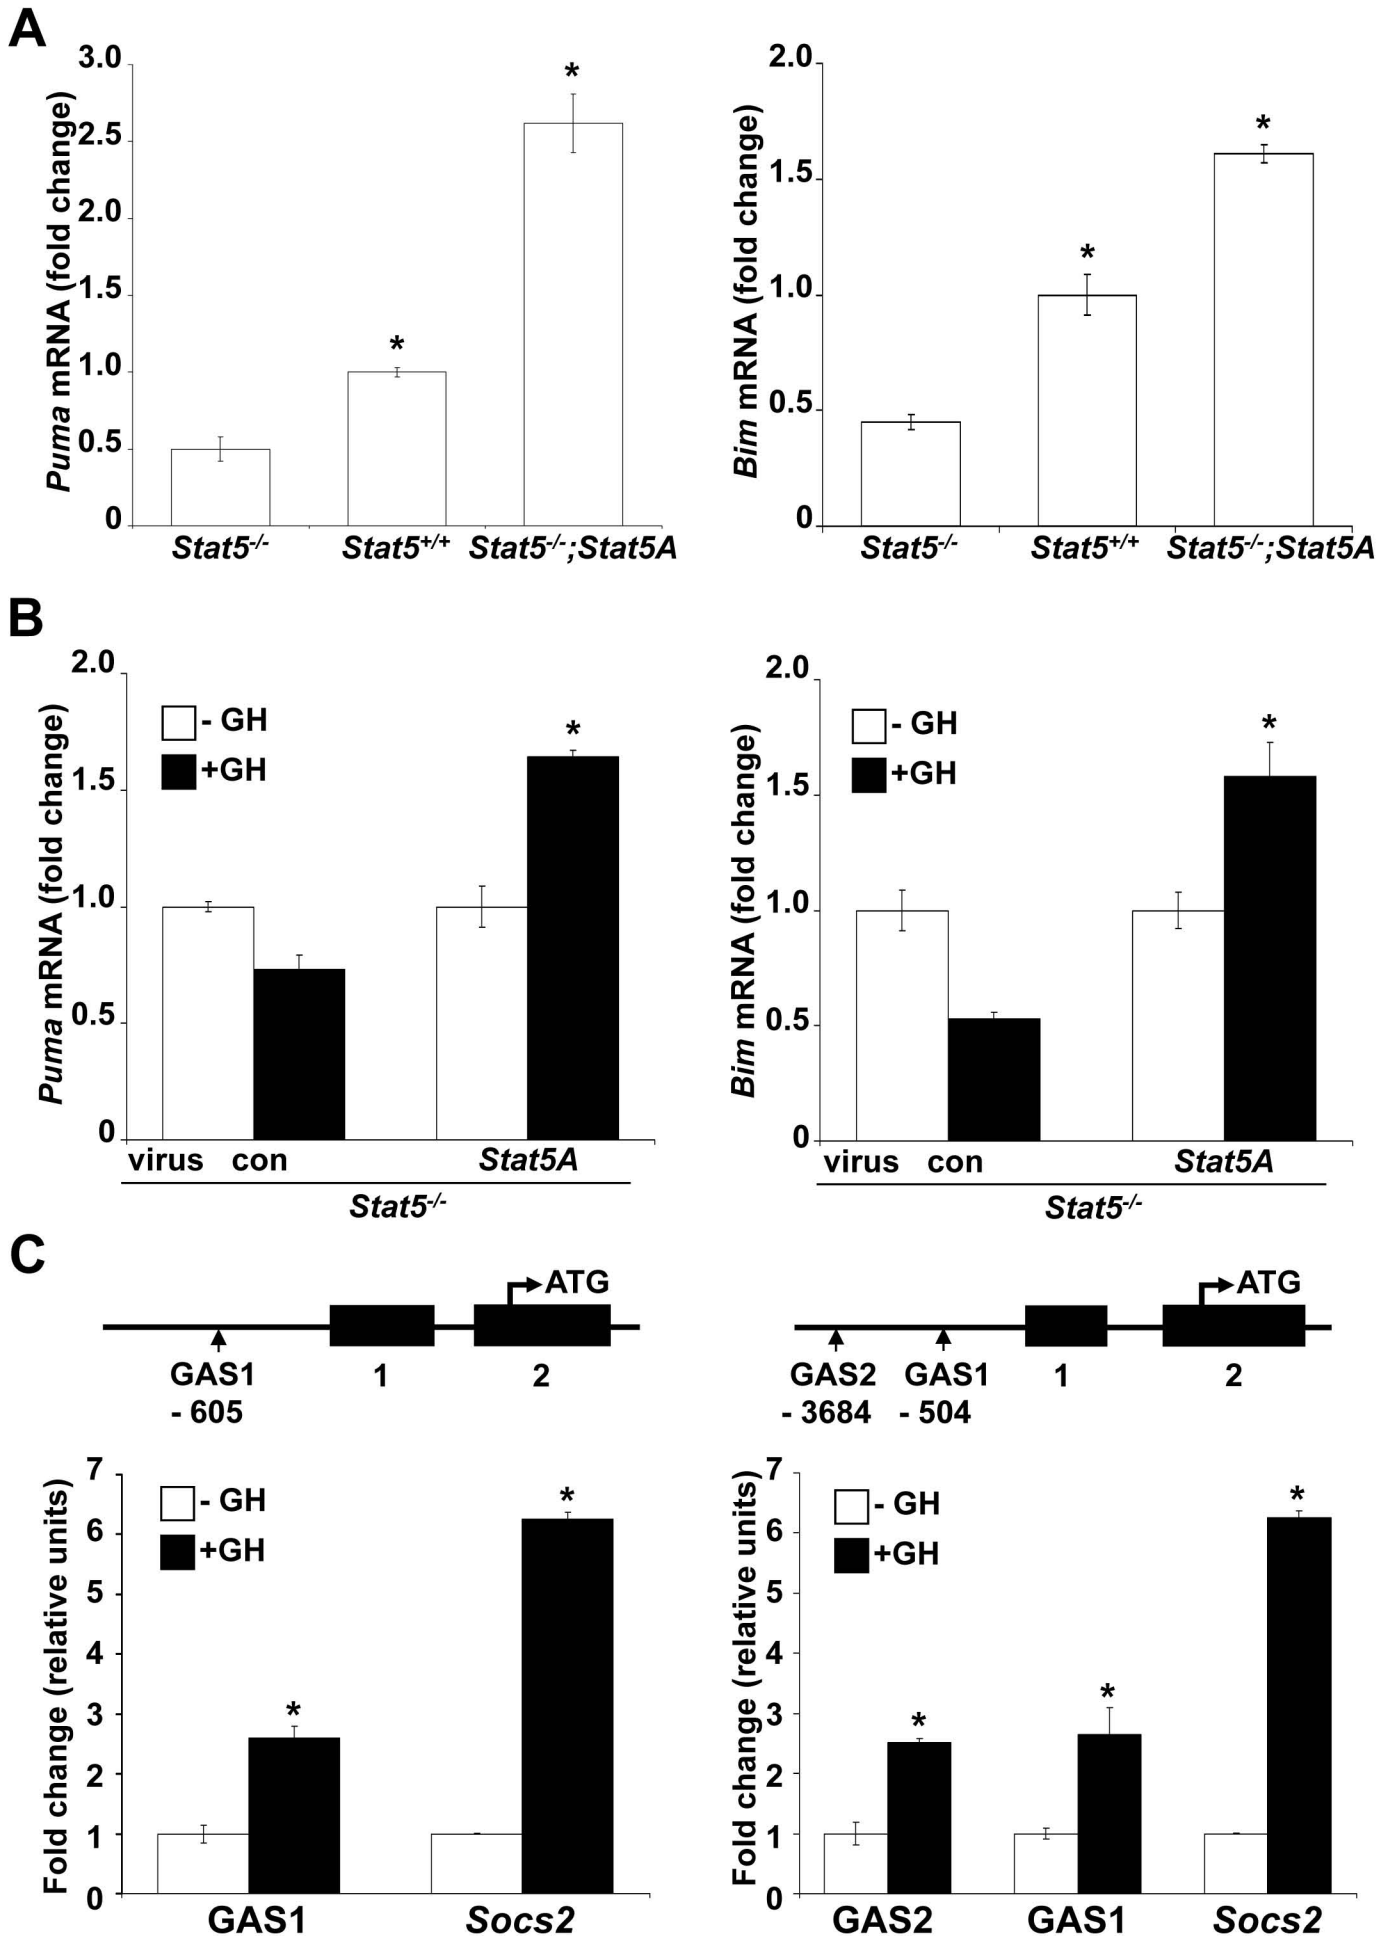

# Supporting figure 5

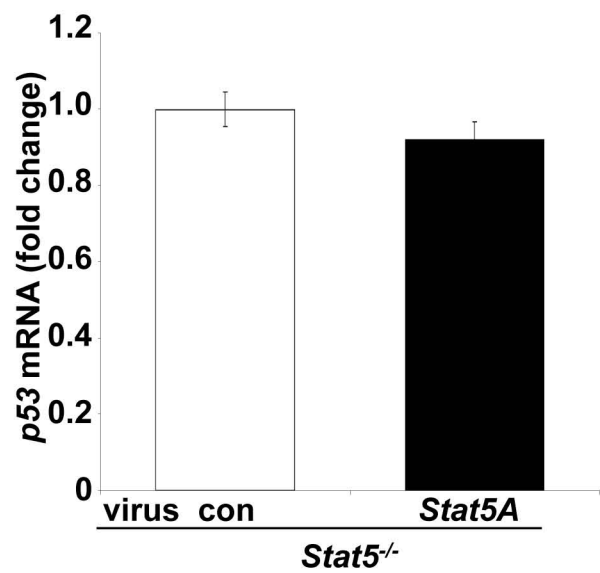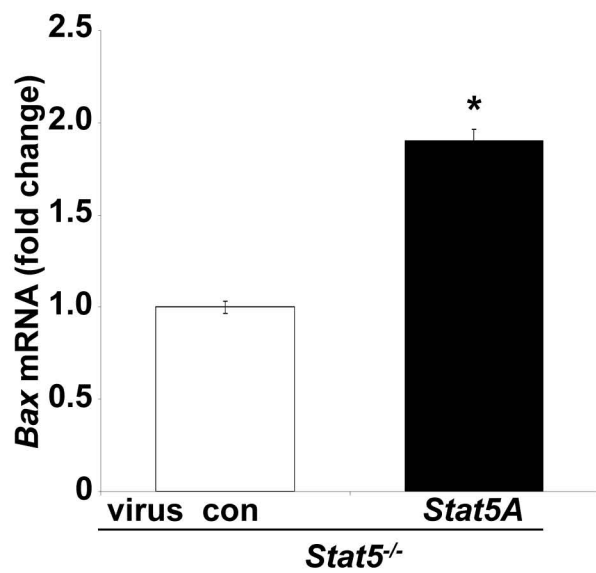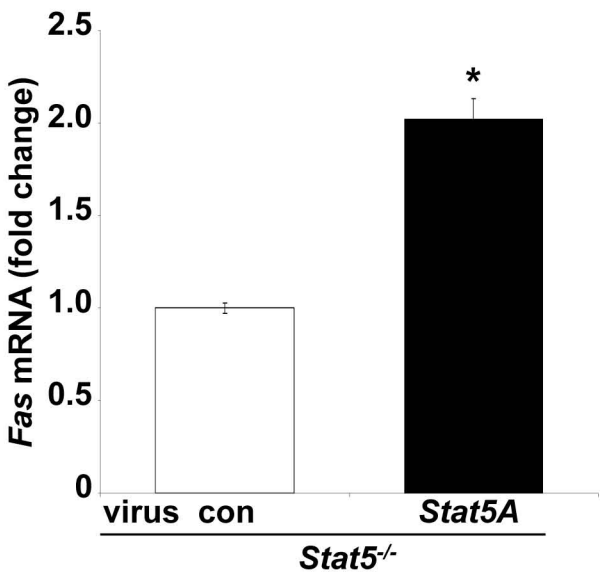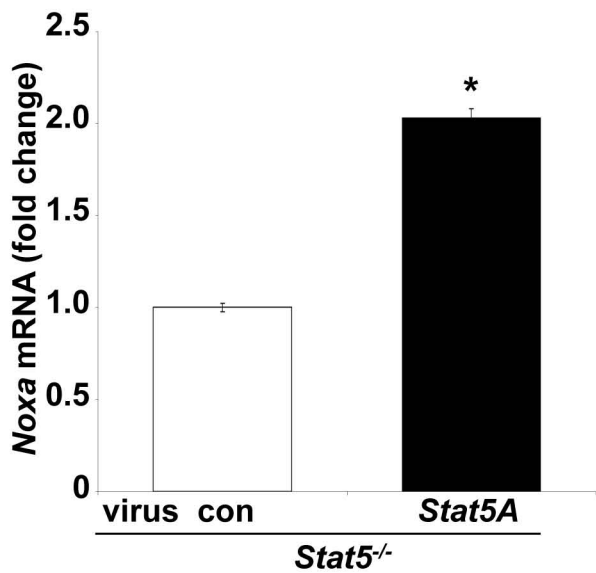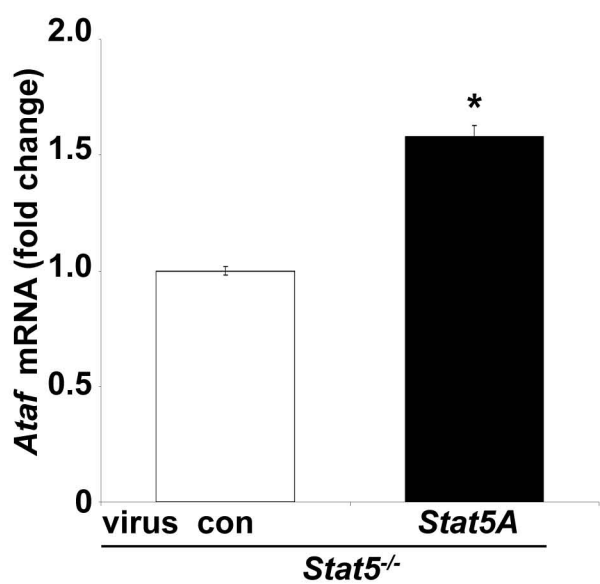

# Supporting figure 6

## A

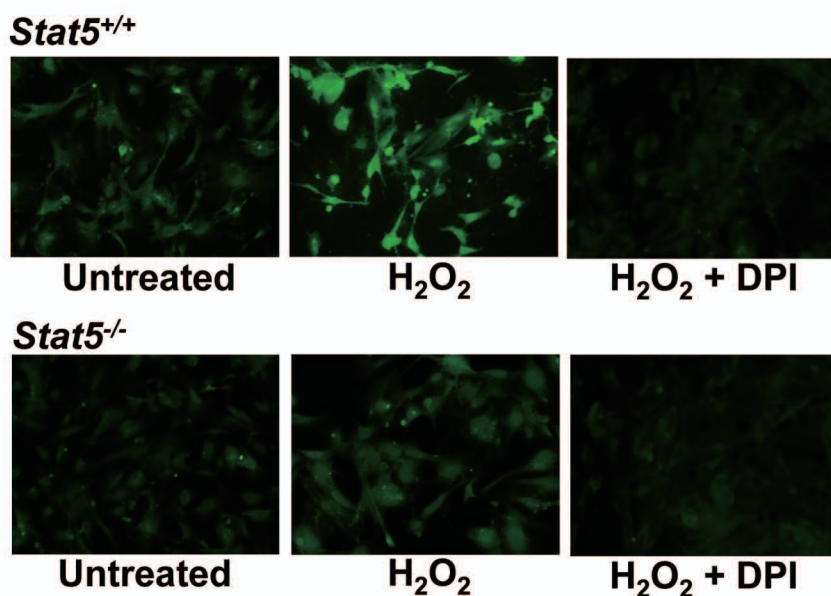

## B

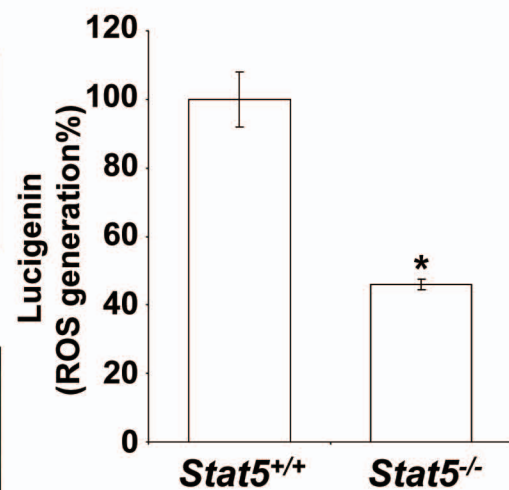

## C

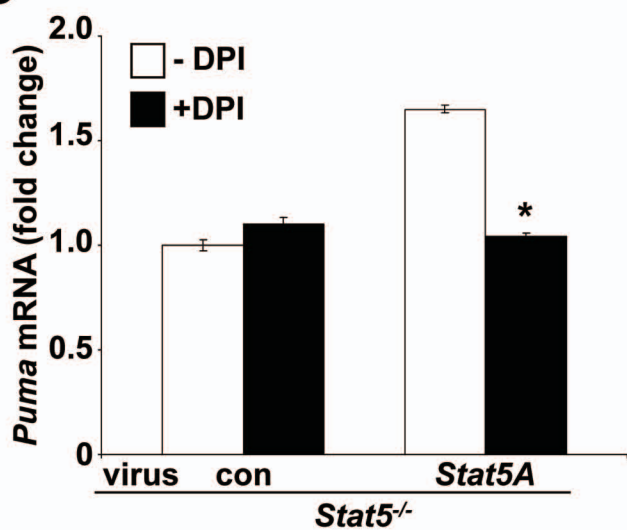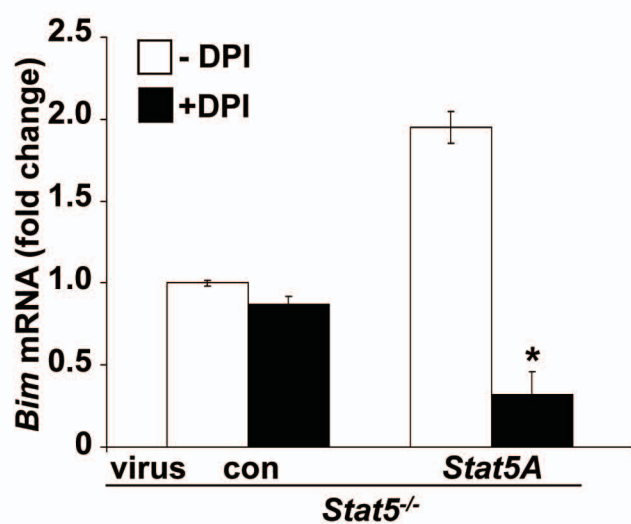

## D

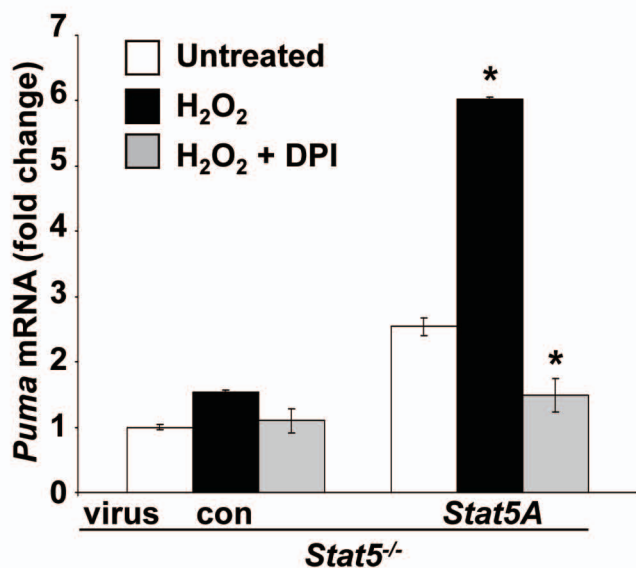

## E

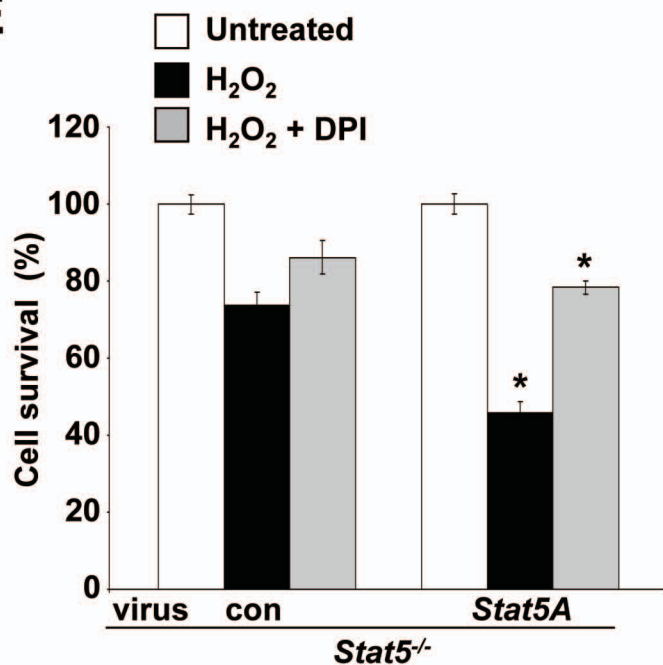

# Supporting figure 7

## A

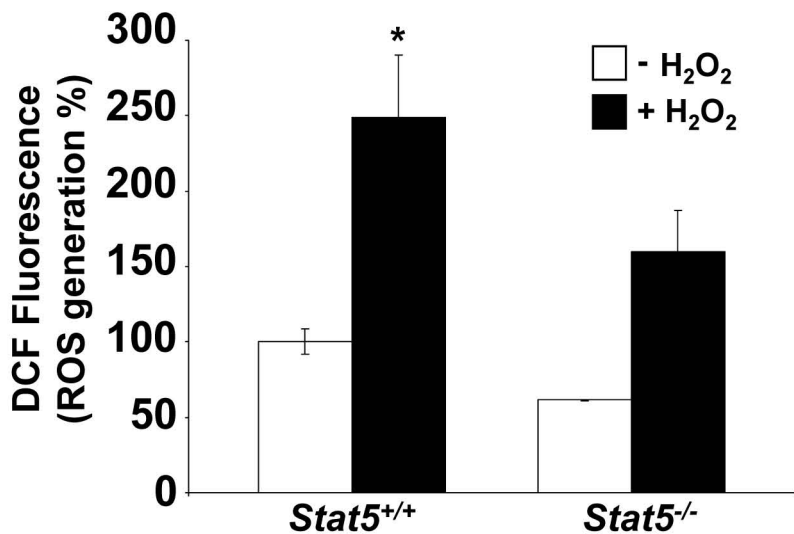

## B

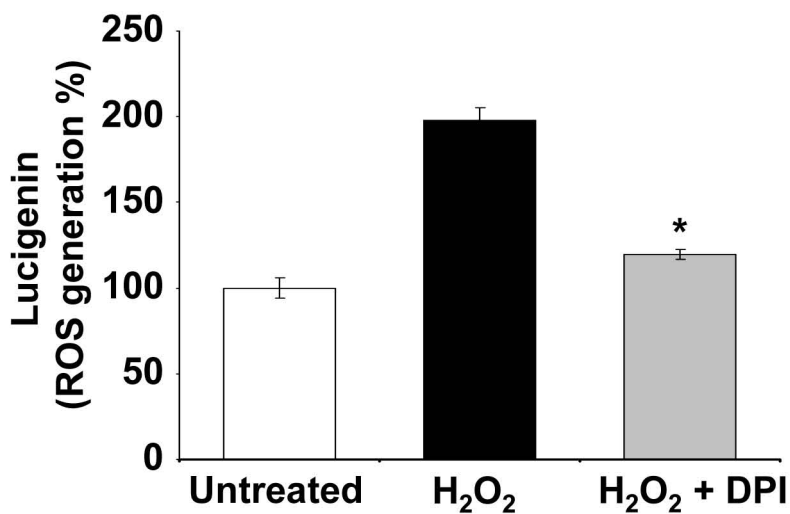

Supplement: NIHMS386084-supplement-Supp_Fig_S1-S7.pdf [file NIHMS386084-supplement-Supp_Fig_S1-S7.pdf]
